# Supplementary material
Source: MDPI journal article supplement (https://www.mdpi.com/2673-8023/4/1/5)
Supplement: s1 [file s1]

# Enhanced Gypsum Boards with Activated Carbon Composites and Phase Change Materials for Advanced Thermal Energy Storage and EMI Shielding Properties

Christina Gioti <sup>1</sup>, Konstantinos C. Vasilopoulos<sup>1,2</sup>, Maria Baikousi <sup>1,\*</sup>, Constantinos E. Salmas <sup>1</sup>, Angelos Ntaflos <sup>1</sup>, Alkiviadis Paipetis <sup>1</sup>, Zacharias Viskadourakis <sup>2</sup>, Rabia Ikram <sup>3</sup>, Simeon Agathopoulos <sup>1</sup>, George kenanakis <sup>2</sup>, Michael A. Karakassides <sup>1,\*</sup>

## Supporting information

**Table S1.** Density of reference gypsum board and composite gypsum boards.

| Sample           | ρ, Density<br>(Kg/m <sup>3</sup> ) |
|------------------|------------------------------------|
| GB               | 0.960                              |
| GB/RT18HC@AC-5%  | 0.930                              |
| GB/RT18HC@AC-10% | 0.910                              |
| GB/RT18HC@AC-15% | 0.880                              |
| GB/RT18HC@AC-20% | 0.830                              |
| GB/RT18HC@AC-30% | 0.810                              |

**Table S2.** Thermal conductivity (k), thermal effusivity (e) and specific heat capacity (C<sub>p</sub>) of reference gypsum board and composite boards GB/RT18HC@AC.

| Sample           | k<br>(W/m K) | e<br>(W*√(s)/(m <sup>2</sup> )*K) | C <sub>p</sub><br>(J/Kg K) |
|------------------|--------------|-----------------------------------|----------------------------|
| GB               | 0,330        | 679                               | 1455,31                    |
| GB/RT18HC@AC-5%  | 0,368        | 720                               | 1514,73                    |
| GB/RT18HC@AC-10% | 0,447        | 803                               | 1639,23                    |
| GB/RT18HC@AC-20% | 0,479        | 835                               | 1753,72                    |
| GB/RT18HC@AC-30% | 0,530        | 887                               | 1832,68                    |

**Table S3.** Maximum load ( $F_{max}$ ), absorbed energy ( $E_a$ ), and percentage increment of  $E_a$  (I) for the gypsum boards with varying % w.t. content of RT18HC@AC additive.

| Sample           | $F_{max}(N)$ | $E_a(J)$ | I(%)   |
|------------------|--------------|----------|--------|
| GB               | 605.84       | 1.632    | 100    |
| GB/RT18HC@AC-5%  | 809.77       | 1.659    | 101.65 |
| GB/RT18HC@AC-10% | 960.07       | 1.709    | 104.72 |
| GB/RT18HC@AC-20% | 678.61       | 1.574    | 96.50  |
| GB/RT18HC@AC-30% | 382.39       | 1.103    | 67.59  |

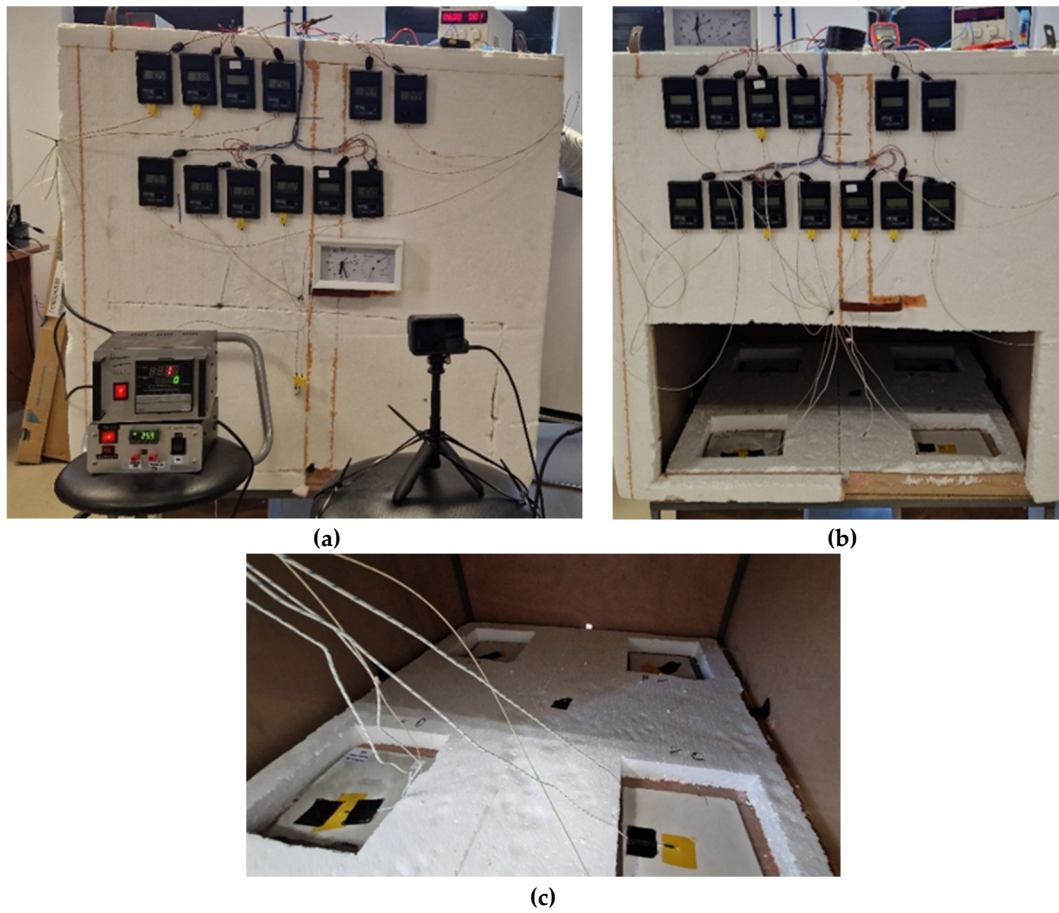

**Figure S1.** Pictures from the custom made environmental chamber. a) The chamber during the measurements, b) and c) the internal area of the chamber.

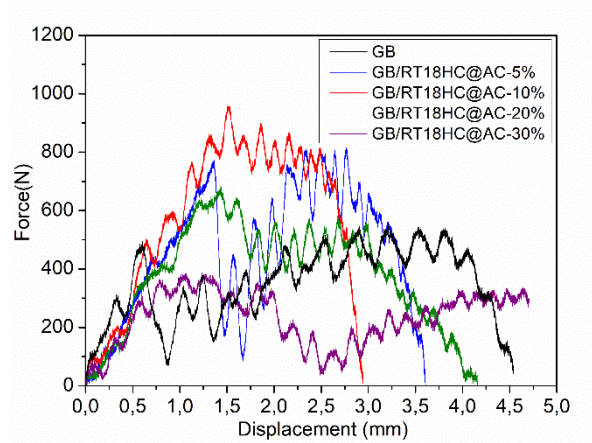

**Figure S2.** Force-displacement plots, obtained from impact resistance tests for the gypsum boards with varying % w.t. content of RT18HC@AC additive.
